# Supplementary material for: Development of Resistance in Escherichia coli ATCC25922 under Exposure of Sub-Inhibitory Concentration of Olaquindox
Source: PubMed Central journal article supplement (PMC7696260; doi:10.3390/antibiotics9110791), 2020-11-10
Supplement: antibiotics-09-00791-s001.pdf [file antibiotics-09-00791-s001.pdf]

Supplementary Materials:

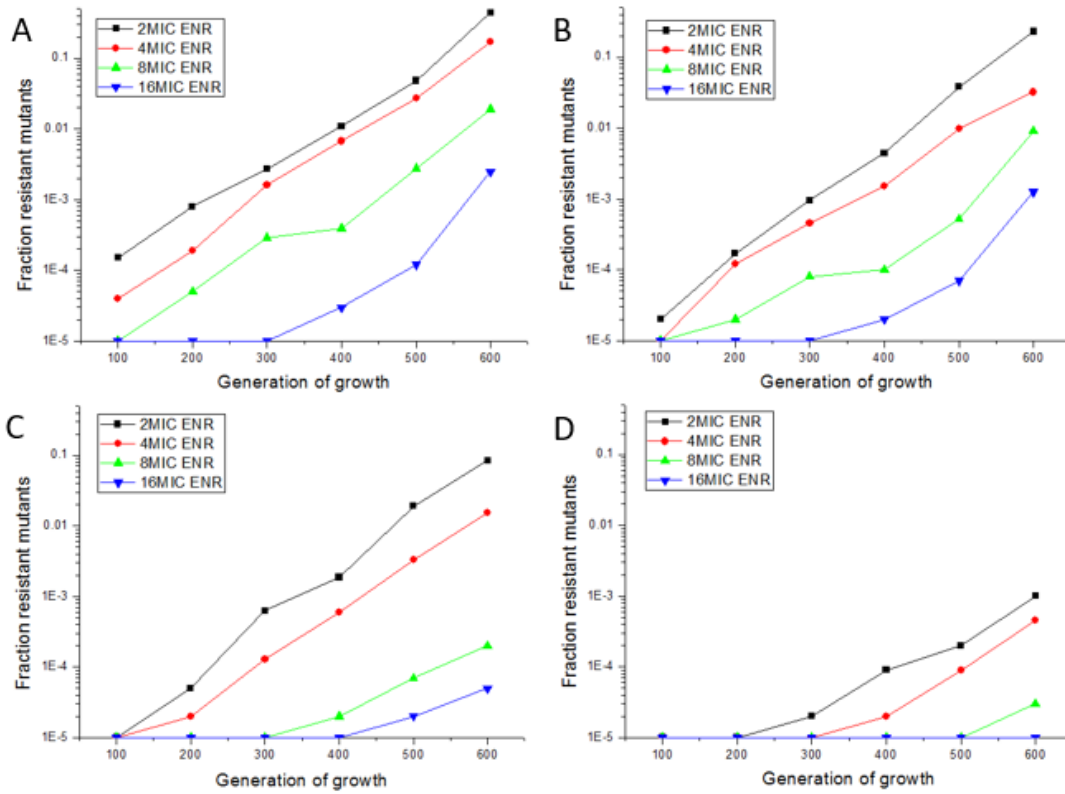

**Figure S1.** Resistance rates of *E. coli* ATCC25922 exposed to ENR at sub-MIC concentrations of 1/2×MIC (A), 1/4×MIC (B), 1/10×MIC (C) and 1/100×MIC (D).

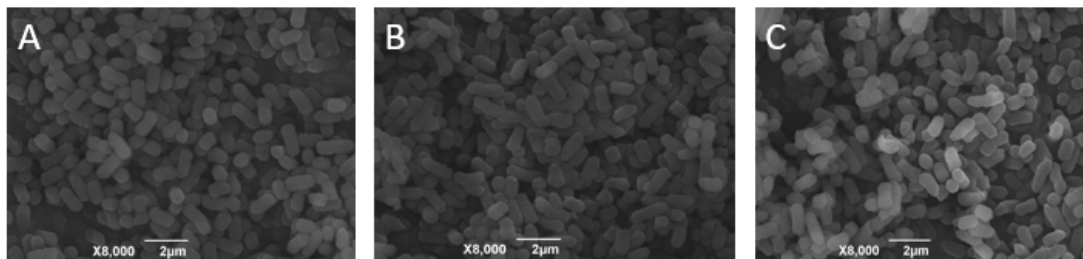

**Figure S2.** Scanning electron micrograph of *E. coli* ATCC25922 induced by none (A), 1/2×MIC ENR (B) and 1/2×MIC OLA (C).

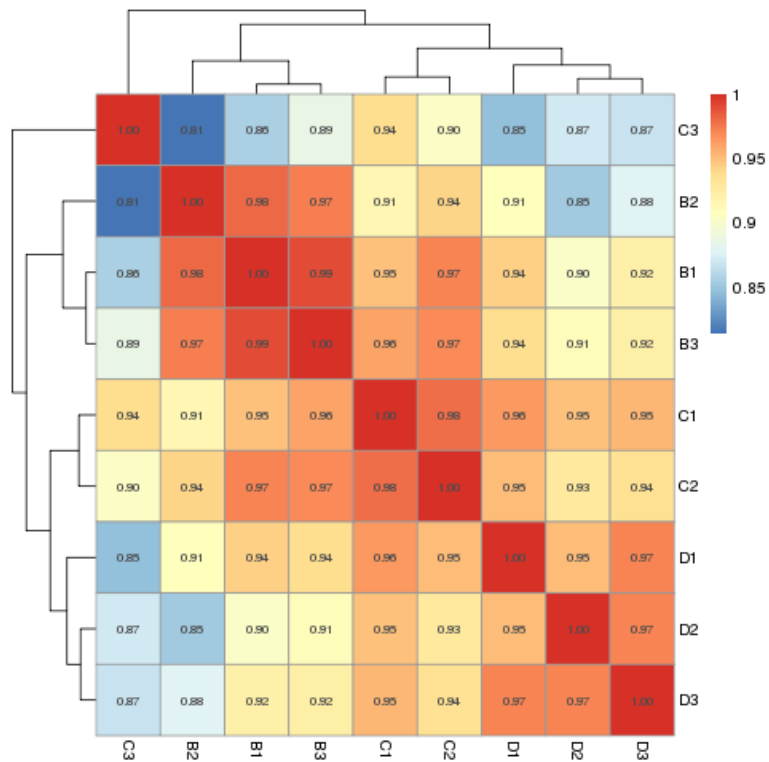

**Figure S3.** Correlation tests for 9 samples (triplicates in each group) of the untreated (group B), 1/2×MIC (group C) and 1/10×MIC OLA (group D)-treated *E. coli* ATCC25922. The abscissa and ordinate in the figure are sample numbers. The closer the block value is to 1, the higher the similarity is.

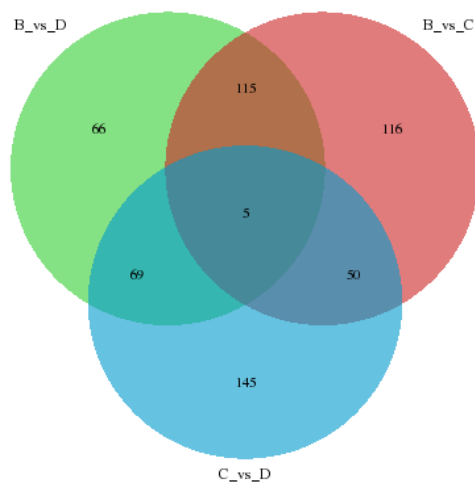

**Figure S4.** Venn diagrams of DEGs. The numbers in each circle represents the total number of DEGs in the comparison combination, and the overlapping part of the circles represents the DEGs shared between the comparison groups. B, untreated group; C, 1/2×MIC OLA-treated group; D, 1/10×MIC OLA-treated group.

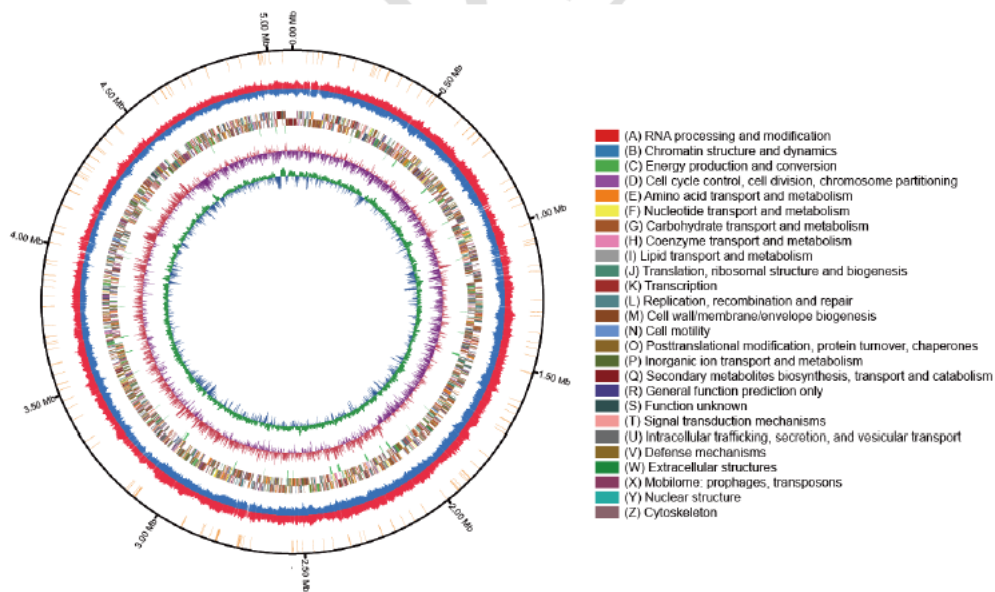

**Figure S5.** The genome of  $1/2\times$ MIC OLA induced *E. coli* ATCC25922 resistant to  $8\times$ MIC OLA. The circles from outermost to innermost indicated the scale, GC content (red:  $>$  average value, blue:  $<$  average value), GC skew (purple:  $>0$ , orange:  $<0$ ), noncoding RNA (tRNA in black, rRNA in red), minus-stranded CDS maps, plus-stranded CDS maps, minus-stranded base-modified map (full red circle), plus-stranded base-modified map (full blue circle), gene map of the restriction modification system, respectively.

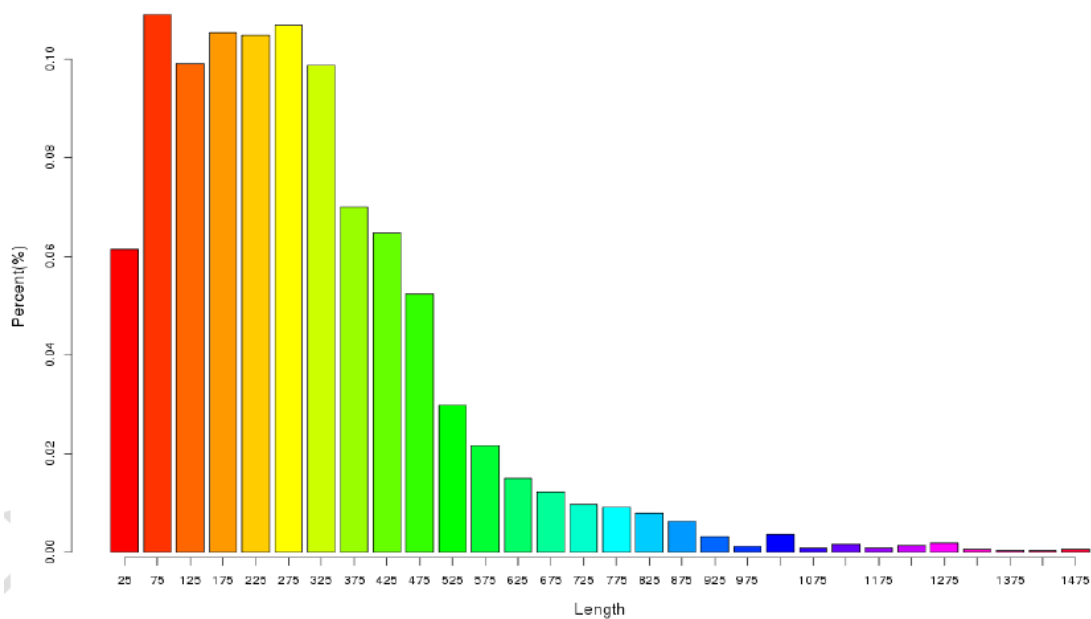

**Figure S6.** Protein length distribution of the genome of OLA resistant *E. coli* ATCC25922

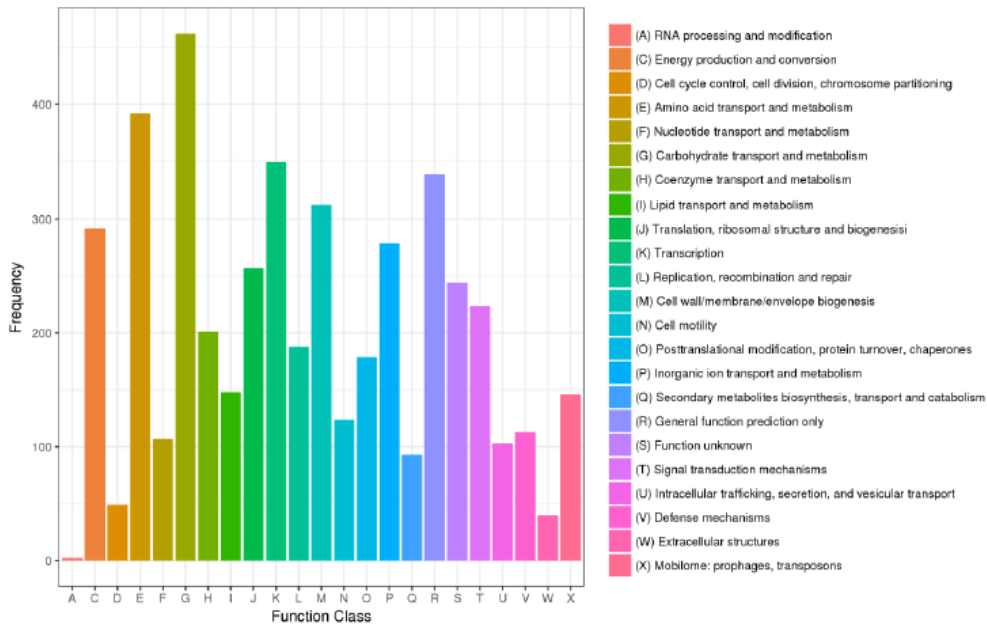

**Figure S7.** COG function classification of OLA resistant *E. coli* ATCC25922. The abscissa is the group of the COG, and the ordinate is the number of genes annotated to the group.

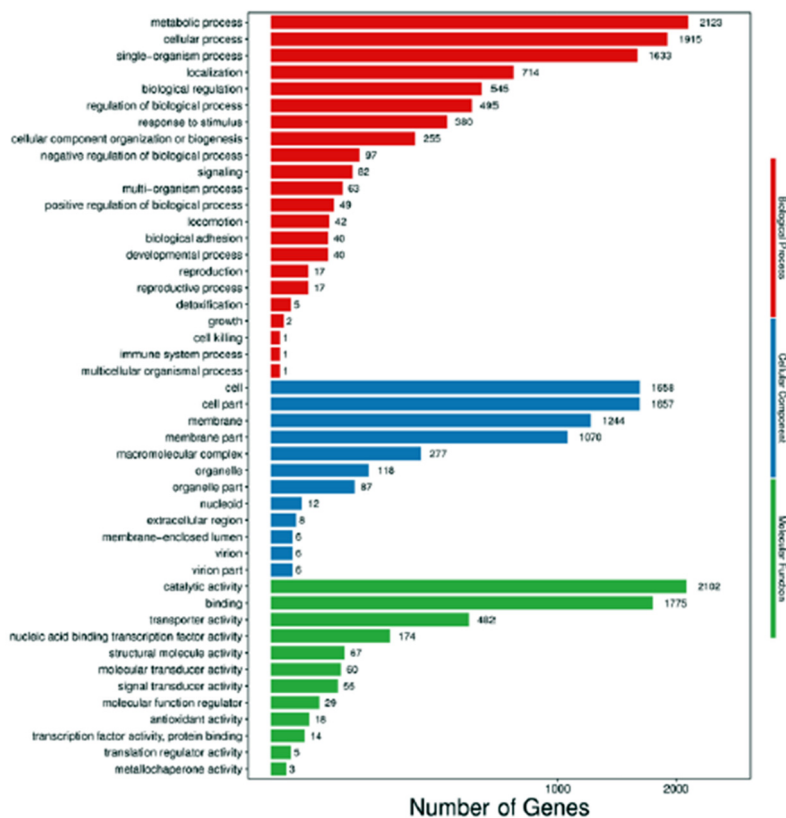

**Figure S8.** GO function annotation of OLA resistant *E. coli* ATCC25922. The ordinate is the three major classes of the GO term including biological processes, cellular components, and molecular functions, the abscissa is the number of genes annotated to the term (including the term of the term).

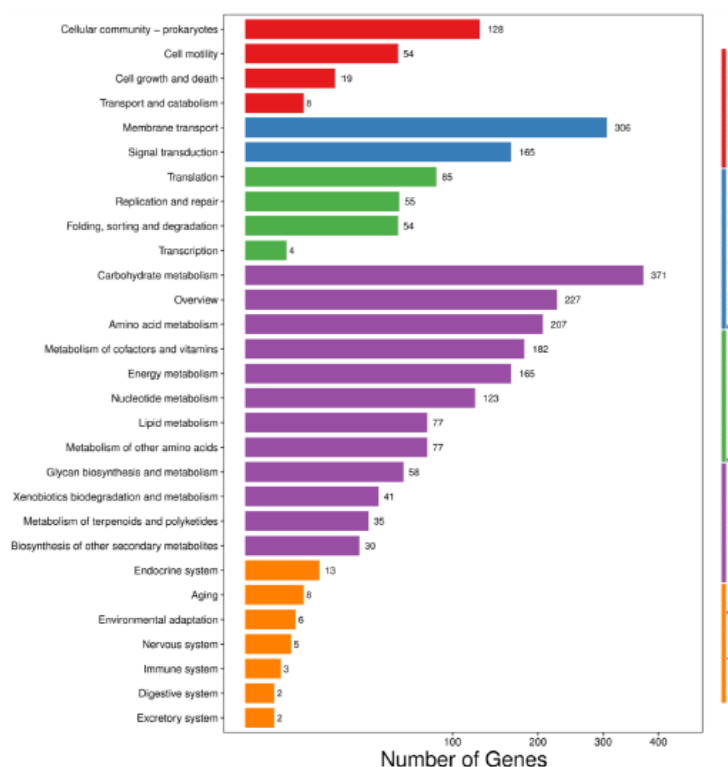

**Figure S9.** KEGG functions annotation of OLA resistant *E. coli* ATCC25922. The ordinate is the name of the KEGG metabolic pathway, and the abscissa is the number of genes annotated to the pathway. The genes are divided into five branches according to the involved KEGG metabolic pathway including Cellular Processes, Environmental Information Processing, Genetic Information Processing, Metabolism, and Organic Systems.

**Table S1.** Data Filtering Statistics

| Sample | Clean Reads No. | Clean Data (bp) | GC (%) | Clean Reads (%) | Clean Data (%) |
|--------|-----------------|-----------------|--------|-----------------|----------------|
| B1     | 21,505,222      | 3,132,423,838   | 52.92  | 97.69           | 94.23          |
| B2     | 22,975,598      | 3,332,505,598   | 53.03  | 98.05           | 94.18          |
| B3     | 18,093,076      | 2,530,130,532   | 52.42  | 96.83           | 89.67          |
| C1     | 21,409,762      | 3,076,509,184   | 53.06  | 97.41           | 92.70          |
| C2     | 22,948,696      | 3,324,945,742   | 52.98  | 97.47           | 93.52          |
| C3     | 22,830,266      | 3,245,333,274   | 53.35  | 97.93           | 92.19          |
| D1     | 21,241,676      | 3,075,246,532   | 53.35  | 98.25           | 94.20          |
| D2     | 22,057,924      | 3,184,275,786   | 52.24  | 97.84           | 93.53          |
| D3     | 18,162,483      | 2,657,601,052   | 52.94  | 95.92           | 92.95          |

**Notes:** Sample, sample name; Clean Reads No., high quality sequence; Clean Data (bp), high quality sequence base number; Clean Reads (%), high quality sequence reads as a percentage of sequencing reads; Clean Data (%), high-quality sequence bases as a percentage of sequencing bases.

**Table S2.** RNASeq Map Statistics

| Sample | Useful Reads | Total Mapped Reads | (%)   | Uniquely Mapped Reads | (%)   | Multiple Mapped Reads | (%)  |
|--------|--------------|--------------------|-------|-----------------------|-------|-----------------------|------|
| B1     | 21,505,222   | 20,978,534         | 97.55 | 20,320,467            | 96.86 | 658,067               | 3.14 |
| B2     | 22,975,598   | 22,435,364         | 97.65 | 21,826,743            | 97.29 | 608,621               | 2.71 |
| B3     | 18,093,076   | 17,684,324         | 97.74 | 17,009,674            | 96.19 | 674,650               | 3.81 |
| C1     | 21,409,762   | 20,506,503         | 95.78 | 19,990,794            | 97.49 | 515,709               | 2.51 |

|    |            |            |       |            |       |           |      |
|----|------------|------------|-------|------------|-------|-----------|------|
| C2 | 22,948,696 | 22,553,947 | 98.28 | 21,954,418 | 97.34 | 599,529   | 2.66 |
| C3 | 22,830,266 | 22,452,343 | 98.34 | 20,715,393 | 92.26 | 1,736,950 | 7.74 |
| D1 | 21,241,676 | 20,786,599 | 97.86 | 20,153,578 | 96.95 | 633,021   | 3.05 |
| D2 | 22,057,924 | 21,577,714 | 97.82 | 21,022,718 | 97.43 | 554,996   | 2.57 |
| D3 | 18,162,438 | 17,678,749 | 97.34 | 17,319,672 | 97.97 | 359,077   | 2.03 |

**Notes:** Sample, sample name; Useful Reads, the total number of sequences used for comparison; Total Mapped Reads, the total number mapped on the reference genome; Uniquely Mapped Reads, the total number of uniquely mapped on the reference genome; Multiple Mapped Reads, , the total number of multiple mapped on the reference genome.

**Table S3.** Reference genome annotation information statistics

| Database     | Number | Percentage (%) |
|--------------|--------|----------------|
| eggNOG Class | 659    | 13.09          |
| KO           | 3,183  | 63.22          |
| Swissprot    | 4,367  | 86.73          |
| NR           | 5,023  | 99.76          |
| GO           | 2,489  | 49.43          |
| All          | 5,035  | 100            |

**Table S4.** Number of differentially expressed genes between groups B and C

| Gene ID  | Gene name | Foldchange(CvB) | Pval        | Regulation      |
|----------|-----------|-----------------|-------------|-----------------|
| gene1037 | hdeB      | 0.416173604     | 0.039349249 | Down Regulation |
| gene1149 | malT      | 6.286487949     | 6.57171E-19 | Up Regulation   |
| gene1159 | feoB      | 2.376601676     | 0.027054731 | Up Regulation   |
| gene1547 | tolC      | 2.111180071     | 0.00084329  | Up Regulation   |
| gene1820 | epd       | 2.003655097     | 0.000521886 | Up Regulation   |
| gene1822 | fbaA      | 2.485279871     | 4.6938E-06  | Up Regulation   |
| gene1842 | gcvT      | 2.163249735     | 0.032429735 | Up Regulation   |
| gene1844 | gcvP      | 2.27532496      | 0.027932863 | Up Regulation   |
| gene1892 | lysA      | 3.850194609     | 0.024807682 | Up Regulation   |
| gene2078 | DR76_1951 | 2.338008596     | 0.003046503 | Up Regulation   |
| gene2079 | ygaZ      | 2.170577798     | 0.004621548 | Up Regulation   |
| gene208  | nuoN      | 2.158540486     | 0.000223431 | Up Regulation   |
| gene209  | nuoM      | 2.295157503     | 7.15188E-05 | Up Regulation   |
| gene210  | nuoL      | 2.569717925     | 3.43364E-06 | Up Regulation   |
| gene213  | nuoI      | 2.339008465     | 0.000110098 | Up Regulation   |
| gene214  | nuoH      | 2.729023109     | 2.11138E-06 | Up Regulation   |
| gene215  | nuoG      | 2.26741505      | 4.11791E-05 | Up Regulation   |
| gene2160 | thiS      | 3.14138092      | 0.017217506 | Up Regulation   |
| gene2161 | thiF      | 2.262346122     | 0.000119187 | Up Regulation   |
| gene2162 | thiE      | 2.139986273     | 0.000230549 | Up Regulation   |
| gene2163 | thiC      | 2.213468175     | 4.92705E-05 | Up Regulation   |
| gene2173 | zraS      | 2.604350749     | 1.52459E-06 | Up Regulation   |
| gene2188 | iclR      | 2.080879956     | 0.000192758 | Up Regulation   |
| gene2231 | pspG      | 0.359895166     | 0.000328609 | Down Regulation |
| gene2262 | soxS      | 4.158545845     | 1.52674E-12 | Up Regulation   |
| gene2315 | phnG      | 0.219241071     | 0.005398822 | Down Regulation |
| gene2328 | basR      | 2.671254039     | 0.039716491 | Up Regulation   |
| gene2391 | hfq       | 2.059921976     | 0.000229179 | Up Regulation   |
| gene2397 | nsrR      | 2.046323258     | 0.00041658  | Up Regulation   |
| gene244  | purF      | 2.157215022     | 0.004765102 | Up Regulation   |
| gene2475 | argF      | 8.005906251     | 3.55483E-05 | Up Regulation   |

|          |           |             |             |                 |
|----------|-----------|-------------|-------------|-----------------|
| gene2476 | arcC      | 4.750575728 | 0.018801951 | Up Regulation   |
| gene2477 | arcA      | 2.914313089 | 0.032660989 | Up Regulation   |
| gene2637 | tsr       | 0.478635922 | 0.000235577 | Down Regulation |
| gene2689 | thrA      | 3.342049743 | 1.80672E-09 | Up Regulation   |
| gene2690 | thrB      | 2.253549625 | 4.60453E-05 | Up Regulation   |
| gene3085 | msrQ      | 0.499051058 | 0.018474372 | Down Regulation |
| gene3172 | motA      | 0.393433092 | 3.58693E-05 | Down Regulation |
| gene3173 | motB      | 0.404071743 | 0.002500896 | Down Regulation |
| gene3250 | manZ      | 8.800461645 | 1.65998E-24 | Up Regulation   |
| gene3251 | manY      | 8.596871218 | 6.51662E-24 | Up Regulation   |
| gene3252 | manX      | 9.392500062 | 6.22114E-26 | Up Regulation   |
| gene3290 | gap       | 2.700035318 | 0.000434982 | Up Regulation   |
| gene3356 | thrS      | 2.007502552 | 0.00032741  | Up Regulation   |
| gene339  | ptsH      | 2.7027774   | 7.2138E-07  | Up Regulation   |
| gene3391 | DR76_3151 | 2.673977789 | 0.007110679 | Up Regulation   |
| gene340  | ptsI      | 2.782279985 | 2.62405E-07 | Up Regulation   |
| gene3452 | rnfD      | 0.476105879 | 0.007072053 | Down Regulation |
| gene3493 | mlc       | 4.024907347 | 6.21121E-07 | Up Regulation   |
| gene3535 | cspG      | 2.394808573 | 0.040079345 | Up Regulation   |
| gene3587 | marR      | 0.478579648 | 0.033977691 | Down Regulation |
| gene3630 | maeA      | 2.003989832 | 0.000349032 | Up Regulation   |
| gene3632 | DR76_3370 | 0.151472946 | 0.000851592 | Down Regulation |
| gene3633 | higA      | 0.162976176 | 0.00082569  | Down Regulation |
| gene3718 | nifJ      | 3.438333246 | 1.00445E-09 | Up Regulation   |
| gene3769 | pspA      | 0.483089373 | 0.008597387 | Down Regulation |
| gene3801 | cysB      | 2.375078789 | 1.14824E-05 | Up Regulation   |
| gene3815 | trpD      | 2.846458913 | 1.41921E-07 | Up Regulation   |
| gene3816 | trpC      | 2.830590427 | 1.74902E-07 | Up Regulation   |
| gene3838 | adhE      | 2.019595092 | 0.011339845 | Up Regulation   |
| gene3910 | umuC      | 0.349858107 | 0.007159459 | Down Regulation |
| gene3944 | DR76_3645 | 0.00258784  | 1.87804E-18 | Down Regulation |
| gene3945 | DR76_3646 | 0           | 3.39818E-12 | Down Regulation |
| gene3947 | DR76_3647 | 0.000994811 | 1.43121E-53 | Down Regulation |
| gene3948 | DR76_3648 | 0.001860027 | 6.16879E-54 | Down Regulation |
| gene3949 | DR76_3649 | 0           | 2.90278E-35 | Down Regulation |
| gene3950 | DR76_3650 | 0           | 4.40985E-44 | Down Regulation |
| gene3951 | DR76_3651 | 0.001890251 | 2.96723E-32 | Down Regulation |
| gene3952 | DR76_3652 | 0.005551654 | 2.0364E-11  | Down Regulation |
| gene3953 | DR76_3653 | 0.001092924 | 3.05036E-65 | Down Regulation |
| gene3954 | DR76_3654 | 0.000447464 | 1.87583E-89 | Down Regulation |
| gene3955 | DR76_3655 | 0.002781491 | 5.45248E-29 | Down Regulation |
| gene3956 | DR76_3656 | 0           | 1.50749E-47 | Down Regulation |
| gene3957 | DR76_3657 | 0.004871698 | 1.41738E-27 | Down Regulation |
| gene3958 | DR76_3658 | 0           | 5.43298E-10 | Down Regulation |
| gene3959 | DR76_3659 | 0.001111319 | 2.30876E-74 | Down Regulation |
| gene3960 | DR76_3660 | 0.005274444 | 1.90361E-24 | Down Regulation |
| gene3961 | DR76_3661 | 0           | 1.00998E-14 | Down Regulation |
| gene3962 | v         | 0.002444649 | 2.01509E-47 | Down Regulation |
| gene3963 | u         | 0           | 8.31221E-16 | Down Regulation |
| gene3964 | DR76_3664 | 0.002031646 | 8.57988E-51 | Down Regulation |

|          |           |             |             |                 |
|----------|-----------|-------------|-------------|-----------------|
| gene3965 | fii       | 0.002839036 | 2.4695E-30  | Down Regulation |
| gene3967 | DR76_3667 | 0.393440026 | 0.000150852 | Down Regulation |
| gene3968 | shp       | 0.257621091 | 4.10222E-07 | Down Regulation |
| gene3972 | DR76_3672 | 0.001190544 | 4.08514E-72 | Down Regulation |
| gene3973 | nul       | 0.001133088 | 2.17213E-48 | Down Regulation |
| gene3977 | DR76_3675 | 0.188861736 | 0.00012422  | Down Regulation |
| gene3978 | bor       | 0           | 8.15094E-34 | Down Regulation |
| gene3981 | DR76_3678 | 0           | 2.09295E-32 | Down Regulation |
| gene3982 | DR76_3679 | 0.012061485 | 9.28705E-17 | Down Regulation |
| gene3984 | ompD      | 0.001341435 | 5.61117E-62 | Down Regulation |
| gene3985 | DR76_3681 | 0           | 6.09157E-17 | Down Regulation |
| gene3986 | DR76_3682 | 0           | 0.00033336  | Down Regulation |
| gene3987 | rusA      | 0           | 8.85573E-19 | Down Regulation |
| gene3989 | DR76_3684 | 0           | 2.8358E-29  | Down Regulation |
| gene3991 | DR76_3685 | 0.002522263 | 9.62403E-23 | Down Regulation |
| gene3992 | ninB      | 0           | 1.52673E-29 | Down Regulation |
| gene3993 | DR76_3687 | 0           | 2.94146E-36 | Down Regulation |
| gene3994 | DR76_3688 | 0.001481676 | 1.34005E-18 | Down Regulation |
| gene3995 | DR76_3689 | 0.003592746 | 1.51145E-18 | Down Regulation |
| gene3996 | cii       | 0           | 8.43133E-30 | Down Regulation |
| gene3997 | DR76_3691 | 0           | 1.20713E-46 | Down Regulation |
| gene3998 | ci        | 0.001649422 | 2.25268E-71 | Down Regulation |
| gene3999 | DR76_3693 | 0           | 6.74859E-25 | Down Regulation |
| gene4000 | DR76_3694 | 0.001063358 | 1.04791E-66 | Down Regulation |
| gene4002 | DR76_3695 | 0.000926164 | 5.37354E-17 | Down Regulation |
| gene4003 | DR76_3696 | 0.004655704 | 3.31469E-19 | Down Regulation |
| gene4005 | DR76_3699 | 0.000925256 | 2.87672E-53 | Down Regulation |
| gene4006 | DR76_3700 | 0           | 7.37848E-23 | Down Regulation |
| gene4007 | ciii      | 0           | 0.000319654 | Down Regulation |
| gene4009 | gam       | 0.002635263 | 5.18399E-30 | Down Regulation |
| gene4010 | bet       | 0.00312365  | 1.66806E-31 | Down Regulation |
| gene4011 | exo       | 0.003781197 | 2.48115E-33 | Down Regulation |
| gene4016 | DR76_3710 | 0.014210948 | 1.07589E-08 | Down Regulation |
| gene4017 | DR76_3711 | 0.002571772 | 1.03903E-51 | Down Regulation |
| gene4018 | DR76_3712 | 0           | 2.26996E-11 | Down Regulation |
| gene4019 | DR76_3713 | 0           | 1.10774E-25 | Down Regulation |
| gene4020 | DR76_3714 | 0.005171468 | 4.55944E-19 | Down Regulation |
| gene4021 | DR76_3715 | 0           | 2.66231E-39 | Down Regulation |
| gene4022 | DR76_3716 | 0           | 3.49507E-30 | Down Regulation |
| gene4023 | DR76_3717 | 0           | 5.37532E-08 | Down Regulation |
| gene4024 | DR76_3718 | 0           | 5.8977E-19  | Down Regulation |
| gene4025 | DR76_3719 | 0.001976286 | 1.69319E-47 | Down Regulation |
| gene4061 | DR76_3752 | 0.149105063 | 5.70831E-15 | Down Regulation |
| gene4062 | DR76_3753 | 0.418478188 | 6.99168E-05 | Down Regulation |
| gene4138 | ptsG      | 8.728464902 | 2.56353E-24 | Up Regulation   |
| gene4155 | rne       | 2.135839031 | 0.000109054 | Up Regulation   |
| gene4175 | grxB      | 2.057899204 | 0.000383901 | Up Regulation   |
| gene4178 | dinI      | 0.497373999 | 0.004178527 | Down Regulation |
| gene4343 | pgaA      | 0.475178387 | 0.000300283 | Down Regulation |
| gene4355 | putA      | 4.812506283 | 0.000732376 | Up Regulation   |



|          |            |             |             |                 |
|----------|------------|-------------|-------------|-----------------|
| gene4366 | wrbA       | 2.601878538 | 2.35744E-06 | Up Regulation   |
| gene4501 | artJ       | 3.519909464 | 0.014195931 | Up Regulation   |
| gene4539 | pflD       | 3.626729631 | 0.031243134 | Up Regulation   |
| gene4635 | cydB       | 2.139536036 | 0.003556127 | Up Regulation   |
| gene4663 | kdpA       | 0.42441005  | 0.001987945 | Down Regulation |
| gene4695 | asnB       | 2.269646001 | 0.008922576 | Up Regulation   |
| gene4808 | folD       | 2.077616432 | 0.000777812 | Up Regulation   |
| gene4864 | htpG       | 2.113712559 | 0.000141863 | Up Regulation   |
| gene4900 | lon        | 2.009305103 | 0.000377403 | Up Regulation   |
| gene4911 | cyoC       | 2.059770545 | 0.00032376  | Up Regulation   |
| gene5017 | betI       | 2.150907493 | 0.006863591 | Up Regulation   |
| gene5018 | betB       | 3.087520379 | 0.006403688 | Up Regulation   |
| gene5019 | betA       | 3.911295368 | 0.006862259 | Up Regulation   |
| gene512  | sthA, udhA | 2.164998758 | 0.002074238 | Up Regulation   |
| gene5196 | hisD       | 2.122290461 | 0.000151859 | Up Regulation   |
| gene5197 | hisC       | 2.539678772 | 3.82224E-06 | Up Regulation   |
| gene5198 | hisB       | 2.440650057 | 9.94704E-06 | Up Regulation   |
| gene5199 | hisH       | 2.725447076 | 1.78234E-06 | Up Regulation   |
| gene5200 | hisA       | 2.505774066 | 1.16583E-05 | Up Regulation   |
| gene5202 | hisIE      | 2.001633443 | 0.000490043 | Up Regulation   |
| gene5270 | fbaB       | 2.059944484 | 0.000413178 | Up Regulation   |
| gene5342 | parA       | 2.507523454 | 2.74327E-06 | Up Regulation   |
| gene549  | hslV       | 2.585393975 | 4.65706E-05 | Up Regulation   |
| gene550  | hslU       | 3.021277608 | 3.10736E-08 | Up Regulation   |
| gene557  | fpr        | 2.312364987 | 3.08066E-05 | Up Regulation   |
| gene587  | fdnG       | 2.274070487 | 2.92295E-05 | Up Regulation   |
| gene588  | fdxH       | 2.144014905 | 0.000126113 | Up Regulation   |
| gene589  | DR76_555   | 2.239530942 | 7.68047E-05 | Up Regulation   |
| gene62   | fghA       | 2.145000688 | 0.000118991 | Up Regulation   |
| gene756  | rbsC       | 2.982012468 | 0.013728127 | Up Regulation   |
| gene757  | ccmA       | 2.987828472 | 0.007486316 | Up Regulation   |
| gene762  | asnA       | 2.388871191 | 0.019935196 | Up Regulation   |
| gene778  | pstS       | 2.125223605 | 0.002974614 | Up Regulation   |
| gene84   | DR76_76    | 2.596421677 | 2.06966E-06 | Up Regulation   |
| gene840  | uhpT       | 0.484434447 | 0.007309444 | Down Regulation |
| gene977  | hokA       | 0.475130914 | 0.004978376 | Down Regulation |

Table S5. Differentially expressed genes between groups B and D

| Gene ID  | Gene name | Foldchange(DvB) | Pval        | Regulation    |
|----------|-----------|-----------------|-------------|---------------|
| gene1014 | fimA      | 2.918425277     | 0.025101628 | Up Regulation |
| gene1062 | manX      | 4.04441837      | 2.77142E-05 | Up Regulation |
| gene1149 | manZ      | 8.501310115     | 5.30348E-05 | Up Regulation |
| gene1159 | ptsG      | 4.143137567     | 0.000151598 | Up Regulation |
| gene1165 | manY      | 2.260348696     | 0.012635561 | Up Regulation |
| gene1285 | malT      | 2.030364316     | 0.020255312 | Up Regulation |
| gene1287 | lamB      | 2.281748519     | 0.032967829 | Up Regulation |
| gene1506 | uspF      | 2.196578071     | 0.00675467  | Up Regulation |
| gene1531 | malG      | 3.127081751     | 6.43564E-05 | Up Regulation |

|          |      |             |             |               |
|----------|------|-------------|-------------|---------------|
| gene1588 | asnA | 3.224542358 | 0.016718398 | Up Regulation |
| gene1701 | bssR | 2.050765178 | 0.016136962 | Up Regulation |
| gene1821 | wrbA | 2.52901171  | 0.007801675 | Up Regulation |
| gene1822 | malF | 2.308563534 | 0.03007916  | Up Regulation |
| gene1842 | soxS | 3.388945775 | 2.04861E-05 | Up Regulation |
| gene1843 | malM | 2.699348325 | 0.001878449 | Up Regulation |
| gene1844 | malE | 2.155612868 | 0.011683097 | Up Regulation |
| gene198  | cydB | 2.216351082 | 0.00766115  | Up Regulation |
| gene209  | asnB | 3.074219718 | 0.049441783 | Up Regulation |
| gene212  | feoB | 2.266494667 | 0.021429023 | Up Regulation |
| gene2171 | uspB | 2.422678639 | 0.001605911 | Up Regulation |
| gene2173 | malK | 2.053949426 | 0.00728735  | Up Regulation |
| gene2214 | grcA | 7.819939887 | 0.000722389 | Up Regulation |
| gene2215 | cydA | 4.873690677 | 0.006194811 | Up Regulation |
| gene2216 | dmsB | 4.52217502  | 0.000288929 | Up Regulation |
| gene2218 | dmsA | 3.949498282 | 2.82106E-05 | Up Regulation |
| gene2219 | gcvT | 8.493937668 | 0.000138362 | Up Regulation |
| gene2220 | adhE | 4.607762611 | 0.006415553 | Up Regulation |
| gene2262 | aspC | 4.647383824 | 0.001221639 | Up Regulation |
| gene2358 | crr  | 2.634026083 | 0.035548719 | Up Regulation |
| gene2359 | exbB | 2.831781558 | 0.025187969 | Up Regulation |
| gene2375 | ibpB | 2.949718944 | 0.007746398 | Up Regulation |
| gene2376 | mlc  | 2.499319635 | 0.016678463 | Up Regulation |
| gene2396 | glgS | 2.610015264 | 0.031029196 | Up Regulation |
| gene2594 | fimI | 23.60719297 | 6.53297E-07 | Up Regulation |
| gene2595 | nuoM | 3.082455871 | 7.65023E-05 | Up Regulation |
| gene2727 | frdB | 2.037712977 | 0.009125024 | Up Regulation |
| gene2818 | dctA | 2.202110218 | 0.02269513  | Up Regulation |
| gene2855 | nmpC | 2.209988815 | 0.00672135  | Up Regulation |
| gene2902 | pflD | 2.020653726 | 0.021425197 | Up Regulation |
| gene3127 | nifJ | 2.897816055 | 0.046615966 | Up Regulation |
| gene3205 | aspA | 2.805944088 | 0.000249909 | Up Regulation |
| gene3250 | grxB | 12.5808921  | 2.26458E-05 | Up Regulation |
| gene3251 | znuC | 10.24931775 | 9.4662E-05  | Up Regulation |
| gene3252 | bssS | 15.63617042 | 2.70507E-06 | Up Regulation |
| gene3351 | gcvH | 2.644900116 | 0.000834235 | Up Regulation |
| gene3374 | ptsI | 2.206953424 | 0.038376078 | Up Regulation |
| gene339  | pfkB | 2.321725493 | 0.027125338 | Up Regulation |
| gene3392 | dcuA | 2.065092433 | 0.017794784 | Up Regulation |
| gene340  | purA | 2.677923235 | 0.022100395 | Up Regulation |
| gene341  | gldA | 3.244937643 | 0.003716137 | Up Regulation |
| gene3473 | fumC | 2.550300159 | 0.016250668 | Up Regulation |
| gene3493 | pgk  | 3.147212541 | 0.008822135 | Up Regulation |
| gene3718 | frdA | 2.863677038 | 0.047077347 | Up Regulation |

|          |      |             |             |                 |
|----------|------|-------------|-------------|-----------------|
| gene3721 | zraP | 8.101818806 | 6.78433E-11 | Up Regulation   |
| gene3838 | ndh  | 3.324283568 | 0.010103604 | Up Regulation   |
| gene4130 | ptsH | 2.354927391 | 0.010802905 | Up Regulation   |
| gene4138 | fbaA | 12.52365578 | 0.000320792 | Up Regulation   |
| gene4175 | fdoI | 2.826443238 | 0.026463539 | Up Regulation   |
| gene4179 | smg  | 2.717495348 | 0.012148112 | Up Regulation   |
| gene4366 | nuoJ | 5.154175379 | 4.91812E-09 | Up Regulation   |
| gene4432 | dmsC | 3.268267254 | 0.003845864 | Up Regulation   |
| gene4461 | ompR | 2.261790406 | 0.027785945 | Up Regulation   |
| gene4462 | fdoG | 3.586014503 | 2.00281E-05 | Up Regulation   |
| gene4463 | menB | 3.438627697 | 1.13198E-05 | Up Regulation   |
| gene4526 | fhuA | 5.361545917 | 5.25961E-08 | Up Regulation   |
| gene4539 | ppsA | 2.894170455 | 0.006875399 | Up Regulation   |
| gene4635 | pdhD | 4.370346697 | 0.000153539 | Up Regulation   |
| gene4636 | mug  | 3.869049949 | 9.99522E-05 | Up Regulation   |
| gene4695 | gcvP | 4.297574351 | 7.83871E-07 | Up Regulation   |
| gene490  | fdoH | 3.911479195 | 0.015830424 | Up Regulation   |
| gene531  | menI | 2.564998039 | 0.037042098 | Up Regulation   |
| gene587  | zraS | 2.228383996 | 0.019395042 | Up Regulation   |
| gene588  | iucA | 2.107056632 | 0.038767258 | Up Regulation   |
| gene589  | caiB | 2.288168091 | 0.02614012  | Up Regulation   |
| gene762  | def  | 6.195468349 | 3.38743E-05 | Up Regulation   |
| gene821  | proS | 3.166330195 | 5.37732E-05 | Up Regulation   |
| gene1311 | iaaA | 0.370553173 | 0.002346096 | Down Regulation |
| gene2000 | prfH | 0.22205358  | 1.02127E-07 | Down Regulation |
| gene2001 | xseA | 0.33049386  | 1.0627E-05  | Down Regulation |
| gene2082 | gmr  | 0.382398502 | 0.010975532 | Down Regulation |
| gene2083 | motA | 0.334520147 | 0.019786557 | Down Regulation |
| gene2319 | tsr  | 0.414359878 | 0.01649518  | Down Regulation |
| gene2637 | rtcB | 0.477084742 | 0.006915879 | Down Regulation |
| gene2655 | yfiP | 0.424647556 | 0.010126366 | Down Regulation |
| gene2656 | rnpA | 0.425149331 | 0.002669034 | Down Regulation |
| gene3141 | cdh  | 0.424046376 | 0.00407274  | Down Regulation |
| gene3172 | guaB | 0.477224891 | 0.003144799 | Down Regulation |
| gene3173 | uhpA | 0.413294691 | 0.006945745 | Down Regulation |
| gene3246 | cysP | 0.360888078 | 0.001902678 | Down Regulation |
| gene344  | rimI | 0.412742527 | 0.000999771 | Down Regulation |
| gene345  | hold | 0.397675183 | 0.003044701 | Down Regulation |
| gene346  | fliZ | 0.386934257 | 0.001177996 | Down Regulation |
| gene347  | phnC | 0.409075352 | 0.000309781 | Down Regulation |
| gene348  | motB | 0.437824958 | 0.000672427 | Down Regulation |
| gene3486 | cysM | 0.35797259  | 0.003061289 | Down Regulation |
| gene3606 | cysU | 0.398019163 | 0.004486981 | Down Regulation |
| gene3632 | gsiA | 0.115069735 | 0.000691037 | Down Regulation |

|          |       |             |             |                 |
|----------|-------|-------------|-------------|-----------------|
| gene3766 | cysP  | 0.310526066 | 0.001720846 | Down Regulation |
| gene3767 | fimA  | 0.29062893  | 2.07592E-06 | Down Regulation |
| gene3768 | cysA  | 0.323047476 | 0.000403679 | Down Regulation |
| gene3769 | rseC  | 0.230200538 | 6.86618E-05 | Down Regulation |
| gene3787 | umuC  | 0.479277369 | 0.008221257 | Down Regulation |
| gene3910 | cysW  | 0.387532769 | 0.014976606 | Down Regulation |
| gene3984 | proW  | 0.0011718   | 1.53002E-38 | Down Regulation |
| gene3987 | dusB  | 0.006578485 | 2.77129E-17 | Down Regulation |
| gene417  | maa   | 0.44849632  | 0.045635128 | Down Regulation |
| gene418  | rlmA1 | 0.489561902 | 0.004991026 | Down Regulation |
| gene4533 | mdtI  | 0.407777971 | 0.000411842 | Down Regulation |
| gene4534 | proV  | 0.497171568 | 0.004853918 | Down Regulation |
| gene481  | cys   | 0.391073992 | 0.008978829 | Down Regulation |
| gene4880 | pspB  | 0.362848489 | 4.64501E-05 | Down Regulation |
| gene495  | pspD  | 0.466760344 | 0.008591379 | Down Regulation |
| gene5074 | pspC  | 0.491524263 | 0.008297094 | Down Regulation |
| gene5075 | pspA  | 0.47483157  | 0.008096959 | Down Regulation |
| gene564  | cysD  | 0.455458305 | 0.006256359 | Down Regulation |
| gene565  | higA  | 0.400512222 | 0.001332772 | Down Regulation |
| gene802  | rusA  | 0.465847256 | 0.017801037 | Down Regulation |
| gene837  | ompD  | 0.441315777 | 0.006076432 | Down Regulation |

---
